# Supplementary material for: Genesis of Two Types of Carbonaceous Material and Associated with Gold Mineralization in the Bumo Deposit, Hainan Province, South China
Source: Preprints.org preprint supplement (doi:10.20944/preprints202007.0442.v1), 2020-07-19
Supplement: Supplementary file 1 [file supplementary]

Table 1. Raman spectroscopy data of layered and veinlet CM samples from the Bumo deposit.

| **Sample ID** | **D1 band Peak /cm-1** | **D1 band area /cm-1** | **G band Peak /cm-1** | **G band area /cm-1** | **D2 band Peak /cm-1** | **D2 band area /cm-1** | **R1 ratio** | **R2 ratio** | **T(°C)**  **Beysac** | **T(°C)**  **Rahl** |
| --- | --- | --- | --- | --- | --- | --- | --- | --- | --- | --- |
| **L-11** | **430** | **29** | **1023** | **33** | **331** | **38** | **0.42** | **0.29** | **511.95** | **548.56** |
| **L-02** | **934** | **30** | **2606** | **51** | **614** | **19** | **0.36** | **0.30** | **507.50** | **521.89** |
| **L-05** | **906** | **33** | **2705** | **57** | **420** | **9** | **0.33** | **0.33** | **492.67** | **480.10** |
| **L-09** | **873** | **34** | **2699** | **57** | **452** | **9** | **0.32** | **0.34** | **489.70** | **469.91** |
| **L-07** | **743** | **33** | **2098** | **58** | **308** | **9** | **0.35** | **0.33** | **494.15** | **488.76** |
| **L-01** | **743** | **35** | **2098** | **56** | **308** | **8** | **0.35** | **0.35** | **483.68** | **463.64** |
| **L-03** | **1339** | **35** | **3944** | **55** | **1723** | **10** | **0.34** | **0.35** | **485.25** | **463.53** |
| **L-16** | **2546** | **39** | **5048** | **52** | **1058** | **8** | **0.50** | **0.39** | **465.70** | **458.37** |
| **L-13** | **407** | **40** | **850** | **51** | **131** | **9** | **0.48** | **0.40** | **463.00** | **445.73** |
| **L-04** | **656** | **38** | **1727** | **53** | **299** | **9** | **0.38** | **0.38** | **471.90** | **442.14** |
| **L-13** | **1334** | **39** | **3292** | **53** | **632** | **8** | **0.41** | **0.39** | **467.45** | **438.01** |
| **V-21** | **3115** | **56** | **4101** | **35** | **2100** | **8** | **0.76** | **0.57** | **389.28** | **331.13** |
| **V-27** | **2144** | **55** | **3187** | **37** | **1077** | **8** | **0.67** | **0.55** | **396.25** | **329.96** |
| **V-24** | **1037** | **54** | **1734** | **37** | **560** | **7** | **0.60** | **0.55** | **395.80** | **312.53** |
| **V-26** | **4122** | **61** | **4448** | **28** | **2448** | **9** | **0.93** | **0.62** | **364.01** | **301.51** |
| **V-30** | **2942** | **60** | **3719** | **31** | **1059** | **8** | **0.79** | **0.61** | **371.30** | **294.20** |
| **V-29** | **3757** | **61** | **4607** | **31** | **2153** | **6** | **0.82** | **0.62** | **364.01** | **281.40** |
| **V-25** | **3062** | **62** | **3387** | **32** | **1374** | **3** | **0.90** | **0.64** | **356.57** | **279.73** |
| **V-28** | **1255** | **60** | **1724** | **33** | **303** | **5** | **0.73** | **0.61** | **368.55** | **275.05** |
| **V-22** | **1449** | **56** | **2837** | **38** | **548** | **4** | **0.51** | **0.57** | **386.71** | **270.52** |
| **V-23** | **2275** | **75** | **1904** | **24** | **613** | **1** | **1.19** | **0.75** | **307.25** | **205.75** |
| **V-31** | **989** | **62** | **2210** | **36** | **139** | **1** | **0.45** | **0.63** | **362.31** | **196.59** |
